# Supplementary material for: Integrating Single-cell RNA-seq to construct a Neutrophil prognostic model for predicting immune responses in non-small cell lung cancer
Source: Springer Nature journal article supplement (doi:10.1186/s12967-022-03723-x), 2022-11-18
Supplement: MOESM1 [file 23727666]

## scRNA-seq Analysis

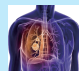

Integrate Sc-RNA datasets  
GSE148071 (n=42),  
GSE131907(n=58)

First-level  
clustering (10 cells)

Second-level  
clustering (28 cells)

Cell communication  
analysis with iTAKL

Pseudotime trajectory  
analysis of Neutrophil  
differentiation status  
by Monocle

GSEA explores functional  
in different  
differentiation states

Integrate TCGA-LUAD (n=585),  
TCGA-LUSC (n=550 )  
Bulk-RNA cohort

CIBERSORT  
annotates the  
TCGA cohort

NDRGs obtained  
between different  
differentiation states

NDRGs mutational  
landscape analysis

## Bulk RNA-seq Analysis

TCGA cohort 7:3 split  
into training set and  
internal validation set

GSE81089 as  
external validation set

DEGs obtained  
from tumor and  
normal subgroups

Intersection genes of  
NDRGs and DEGs

6 NDRGs associated  
with prognosis

Construction of prognostic  
risk model based on NDRGs /  
reference genes rate by Elastic  
Net Regression and  
Multivariate Cox

Exploring immune  
infiltration in  
prognostic risk models

Mock Low-xpression  
or Overexpression

Screening small molecule  
compounds that  
help fight tumors

ROC, nomogram, and KM  
verify the performance of  
the prognostic model

Exploring the clinical  
application value of  
prognostic models

GSEA explores pathway  
changes after  
dysregulation of NDRGs

AutoDock realizes  
docking of NDRGs  
and compounds
