# Supplementary material for: Integrating Single-cell RNA-seq to construct a Neutrophil prognostic model for predicting immune responses in non-small cell lung cancer
Source: Springer Nature journal article supplement (doi:10.1186/s12967-022-03723-x), 2022-11-18

A

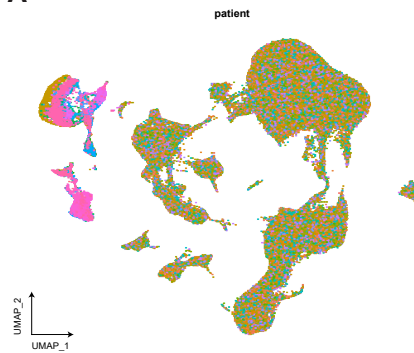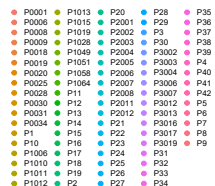

B

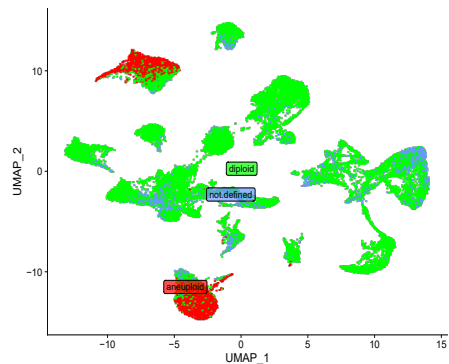

C

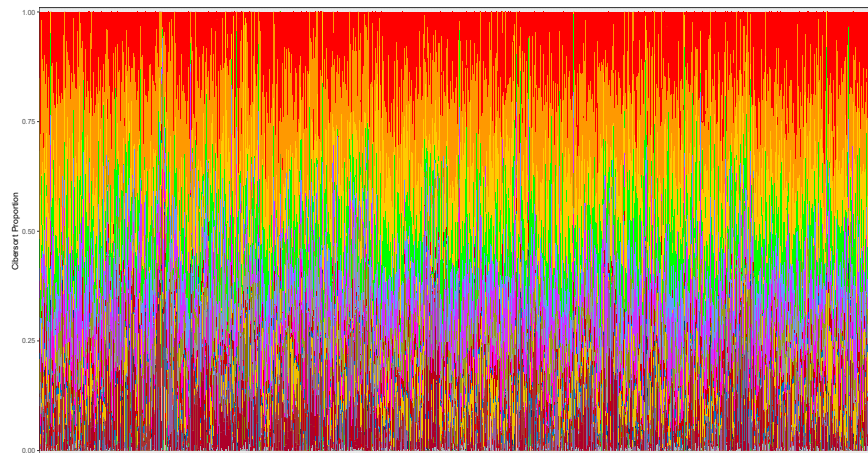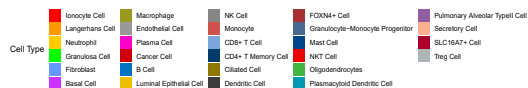

Supplement: MOESM2 [file 23727666]
