# Supplementary material for: Integrating Single-cell RNA-seq to construct a Neutrophil prognostic model for predicting immune responses in non-small cell lung cancer
Source: Springer Nature journal article supplement (doi:10.1186/s12967-022-03723-x), 2022-11-18

**A****Spearman Correlation between M5A7T Expression and Immune Cells**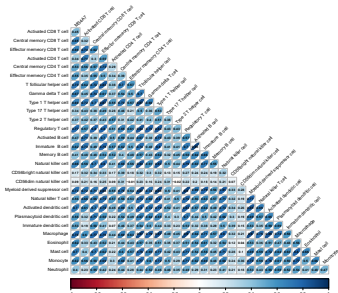**B****Spearman Correlation between CXCR2 Expression and Immune Cells**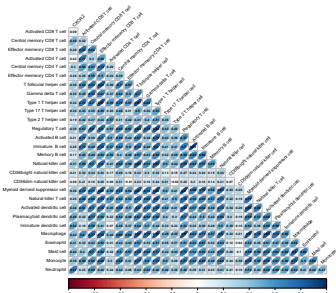**C****Spearman Correlation between LUCAT1 Expression and Immune Cells**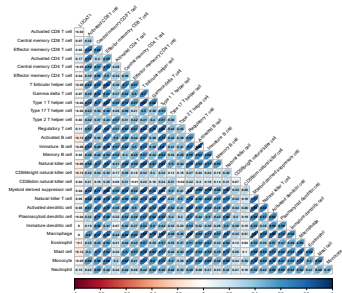**D****Spearman Correlation between CDRNP1 Expression and Immune Cells**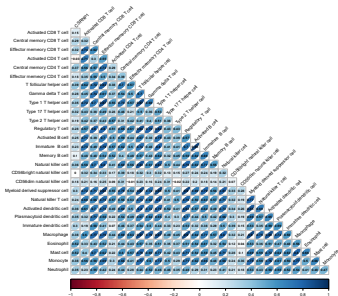**F****Spearman Correlation between RETN Expression and Immune Cells**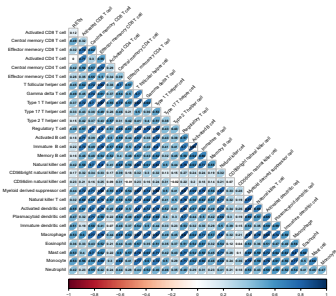**E****Spearman Correlation between CD177 Expression and Immune Cells**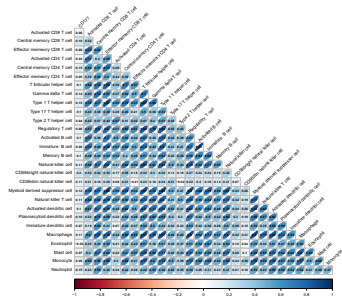

Supplement: MOESM4 [file 23727666]
